1  
2  
3  
4  
5  
6  
7  
8  
9  
10  
11  
12  
13  
14  
15  
16  
17  
18  
19  
20  
21  
22  
23  
24  
25  
26  
27  
28  
29  
30

## **Genetic diversity of the enteroviruses detected from Cerebrospinal fluid (CSF) samples of patients with suspected aseptic meningitis in northern West Bank, Palestine in 2017**

Kamal Dumaidi<sup>1\*</sup>, Amer Al-Jawabreh<sup>1,2</sup>, Fekri Samarah<sup>1</sup>, Areej Zreeq<sup>1</sup>, Dirgham Yaseen<sup>3</sup>

<sup>1</sup> Department of Medical Laboratory Sciences, Faculty of Allied Health Sciences, Arab American University, Palestine

<sup>2</sup> Al-Quds Public Health Society, Jerusalem, Palestine

<sup>3</sup> Rafeedia Medical Laboratory Hospital, Palestinian Ministry of Health, Palestine

**\*Corresponding author;**

**E. Mail;** [Kamal.dumaidi@aaup.edu](mailto:Kamal.dumaidi@aaup.edu); [kdumaidi@hotmail.com](mailto:kdumaidi@hotmail.com)

## 31 **Background**

32 Human enterovirus (HEV) is a non-enveloped RNA genus of the family *Picornaviridae* with more  
33 than 107 genotypes. HEV is divided into 4 HEV species designated HEVA to D, based on the  
34 sequences analysis of the partial or complete VP1 region of the viral genome[1]. The VP1 are  
35 immunodominant capsid proteins that contain the neutralization antigenic determinants which  
36 correlate well with serotyping and are used for HEV genotyping[2].

37 HEVs are associated with several diverse clinical manifestations including mild febrile illness,  
38 gastroenteritis, respiratory tract infection, neonatal sepsis-like illness and aseptic meningitis as the  
39 most frequent infections caused by HEV that occurs as sporadic and/or outbreaks of varying size.  
40 HEV-B causing aseptic meningitis include echoviruses, some enteroviruses coxsackievirus B[3-  
41 5]. Furthermore, a sever and potentially fatal conditions including encephalitis, acute flaccid  
42 paralysis, myocarditis and hand-foot-mouth disease had been reported [6-10].

43 In the last two decades, echovirus18 (E18) and coxsackievirus B5 (CVB5), serotypes of HEV-B,  
44 have been isolated from sporadic and outbreak cases of aseptic meningitis in China, Taiwan,  
45 Germany, Korea, Australia and Palestine. These isolates were found to be associated with various  
46 degrees of illness among newborns, infants and school-age children, ranging from asymptomatic  
47 to fatal aseptic meningitis [10-17].

48 The high mutation rate and the RNA recombination are responsible for genetic diversity of the  
49 enteroviruses [18].The recombination increases viral pathogenicity, eliminates lethal mutations  
50 and increases fitness of virus [18]. Of the four species, A, B, C and D, HEV-B was shown to have  
51 the highest rates of recombination particularly between members of the same species [19-20].The  
52 few studies that investigated the molecular characterization of the two HEVs (E18 and CVB5),

53 showed a wide range of genetic diversity in the VP1 region coding for the outer surface protein,  
54 which involved in virus–cell interactions that might explain their high endemicity and infection  
55 severity among the newborns, infants, children and adults[12-16]. The aim of the present study  
56 was to identify the most predominant enteroviruses which circulated in the northern West Bank,  
57 Palestine in 2017 using RT-PCR followed by sequencing and to investigate the genetic diversity  
58 of the sequences of the partial VP1 region.

## 59 **Materials and Methods**

### 60 **Sample and data collection**

61 During the period of March, 1<sup>st</sup> to October, 31<sup>th</sup>, 2017, 249 cerebrospinal fluid (CSF) specimens  
62 were collected from children admitted, with suspected aseptic meningitis, to Rafeedia  
63 governmental hospital in Nablus and Jenin governmental Hospital in Jenin and were store at -20  
64 °C until use. All CSF samples were proven negative for classical bacterial pathogens by the  
65 hospital microbiology laboratory. Patients' demographic data and clinical history including age,  
66 sex, sign and symptoms, place of residence, date of onset of symptoms, and CSF laboratory test  
67 results were retrieved from the patients' files. The study was approved by the Ministry of Health  
68 in Palestine under reference number ATM/125/2013

### 69 **Viral RNA extraction**

70 The HEV RNA was extracted from 200 µl of CSF using a QIAamp viral RNA Mini Kit (QIAGEN,  
71 Valencia, CA, USA) according to the manufacturer's instructions

72

73

## 74 **RT-PCR**

75 To identify the enterovirus associated aseptic meningitis cases, the HEV RNA was amplified using  
76 two primer sets targeting the 5'NCR of the HEV genome as described and modified previously[10,  
77 21]. For HEV genotyping, an RT-PCR with two primer sets was used to amplify the 5' half of the  
78 VP1region of the viral genome as described previously[10, 22]. PCR amplicons were purified  
79 using the NucleoSpin Gel and PCR Clean-up from Machery Nagel (Germany) before sending for  
80 commercial sequencing.

## 81 **Enterovirus typing and phylogenetic analysis**

82 The HEV identity was investigated by searching the partial VP1 sequences obtained in this study  
83 in comparison with the HEV prototypes and other HEVs sequences available in GenBank using  
84 basic local alignment (BLAST, <http://www.ncbi.nlm.nih.gov/BLAST>). The HEV that showed  
85 more than 75% nucleotide similarity was assigned to be the same genotype. Phylogenetic analyses  
86 of the RNA sequences of E18 and CVB5 genotypes were conducted based on the neighbor-joining  
87 (NJ) methods with Tamura-Nei and Kimura 2-parameter models implemented in MEGA 6 with  
88 1000 bootstraps replicates for branch confidence in clades in each tree (Tamura et al., 2013).  
89 Poliovirus was used as an out-group.

## 90 **Recombination analysis**

91 The aligned E18 and CVB5 sequences were tested for any possible recombination events using  
92 the RDP 4 software [23]. All seven default statistical tools were employed including PHI statistic  
93 ( $\Phi_w$ . or pairwise homoplasy index, PHI)[24], Geneconv [25], Bootscan [26], Max  $X^2$  [27],  
94 Chimaera [28], SiScan, and 3Seq [29]. P-value differs depending on the recombination test used,

95 number of sequences analyzed where P-value is subsequently corrected by the RDP 4 default  
96 Bonferroni-correction. The recombination tests were performed using default settings and a  
97 Bonferroni-corrected *P* value cutoff of 0.05. The recombination analyses were confirmed by  
98 SplitTree 4 (ver. 4.14.6) software [30] using PHI statistic [24] and DnaSP 5.1 software [31].

## 99 **Genetic diversity analysis and neutrality tests**

100 To account for the limited number of genotype HEV cases (26) and the intermediate length of VP1  
101 sequence (400bp) and the diversity that might be caused external factors such as amplifications  
102 and sequencing, several diversity indices were used [32]. The genetic diversity of the 13 E18 and  
103 the 11 CVB5 (9 in the present study and the 2 previously detected in 2013) detected in Palestine  
104 were analyzed based on VP1 gene. The 27 E18 from 10 different countries reported in the period  
105 of 1999-2017 and 25 CVB5 from 13 different countries reported in the period between 1971 and  
106 2017 were retrieved from the Genbank and included in the analysis. EV18 and CVB5 RNA  
107 sequences were separately aligned using MEGA 6 [33]. Then, the genetic diversity of the VP1  
108 gene in both E18 and CVB5 genotypes were calculated based on parameters including haplotype  
109 diversity ( $H_d$ ), nucleotide diversity ( $\pi$ ). Haplotype diversity (or gene diversity) refers to the number  
110 of haplotypes in the population. Nucleotide diversity is the average number of nucleotide  
111 differences per site in pairwise comparison between RNA sequences[34]. To detect departure from  
112 neutral theory of evolution (random mutation) at a constant population size, two neutrality tests  
113 were used. The first was Tajima's *D* test which compares the differences between the numbers of  
114 segregating sites (*S*) and the average number of nucleotide differences between two randomly  
115 chosen sequences from within in the population (*K*)[35]. The second test was Fu and Li's *F* test  
116 which compares differences between the number of singleton mutations and the average number

117 of nucleotide differences between pairs of sequences [36]. DnaSP 5.1 software was used for the  
118 calculation at default settings[37].

## 119 **Statistical analysis**

120 Epidemiologic data were analyzed using EpiInfo statistical package. Analysis included  
121 distribution, 2x2 tables, and frequency tables. Fisher's exact test and Chi square with 95%  
122 confidence interval were calculated. The level of statistical significance was  $P < 0.05$ .

123

124

125

126

127

128

129

130

131

132

133

134

135

136

137

138

139

## 140 Results

### 141 Demography of circulating EVs

142 A total of 249 CSF samples were collected from hospitalized patients suspected of having aseptic  
143 meningitis in the period between March-- October, 2017. Overall, 54/249 (22%) yielded positive  
144 results for HEV using RT-PCR targeting the 5'UTR. The general characteristic and the clinical  
145 history of the study samples are shown in table 1.

146 **Table 1. Demographic data and clinical history of the study samples**

|                              | Total 249<br>No. (%) | EV<br>54    | Non-EV<br>195 |
|------------------------------|----------------------|-------------|---------------|
| Sex:                         |                      |             |               |
| Male                         | 156 (62.5)           | 33          | 123           |
| Female                       | 93 (27.5)            | 21          | 72            |
| Age in month, median (range) | 6 (0-92)             | 7 (0-92)    | 6 (0-90)      |
| Place of residence:          |                      |             |               |
| Nablus                       | 156 (62.6)           | 26 (48.1)   | 130 (66.7)    |
| Jenin                        | 93 (37.4)            | 28 (51.9)   | 65 (33.3)     |
| Pleocytosis                  | 50/179 (28)          | 13 (26)     | 37 (74)       |
| Fever                        | 233/249 (93.6)       | 179 (77)    | 54 (23)       |
| Headache                     | 66/249 (26.5)        | 33 (50)     | 33(60)        |
| Diarrhea                     | 53/249 (21.3)        | 20/54 (37)* | 33/195        |
| Vomiting and Nausea          | 82/249 (32.9)        | 26/54*      | 56/195        |
| Stiff neck                   | 18/249 (7.2)         | 13/41*      | 5/195         |
| Photophobia                  | 9/249 (3.6)          | 7/54 (13)*  | 2/195         |
| Mental disturbances          | 5/249 (2)            | 2 (40)      | 3(60)         |

147 \* P < 0.05

148 Twenty-six (48%) were successfully genotyped by sequencing the amplicon of the amplified 5'  
149 VP1 region. Four different types of HEVs were detected. All of them belong to HEV-B species.  
150 Thirteen of the detected HEVs (50%) were E18, 9 (34.5%) were coxsackievirus B5 (CVB5), 3  
151 (11.5%) were E25 and 1 (3.8%) was CVB2. Demographic data, the clinical history and the gene  
152 Bank accession number of the genotypes HEV cases are shown in Table 2.

153

154

155 **Table 2. Demographic data and clinical characteristic of the diagnosed HEVs genotypes**

| Sample No. | Accession No. | EV genotype | Month/year of isolation | Age (month) | District |
|------------|---------------|-------------|-------------------------|-------------|----------|
| 170J/017   | MG773498      | E18         | 04/2017                 | 33          | Jenin    |
| 186J/017   | MG773499      | E18         | 05/2017                 | 64          | Jenin    |
| 188J/017   | MG773500      | E18         | 05/2017                 | 16.5        | Jenin    |
| 208N/017   | MG773501      | E18         | 05/2017                 | 70          | Nablus   |
| 227J/017   | MG773502      | E18         | 07/2017                 | 57          | Jenin    |
| 232J/017   | MG773503      | E18         | 08/2017                 | 3           | Jenin    |
| 247J/017   | MG773504      | E18         | 07/2017                 | 5           | Jenin    |
| 257J/017   | MG773505      | E18         | 08/2017                 | 81          | Jenin    |
| 262J/017   | MG773506      | E18         | 08/0217                 | 67          | Jenin    |
| 265J/017   | MG773507      | E18         | 08/2017                 | 3           | Jenin    |
| 344J/017   | MG773508      | E18         | 04/2017                 | 6           | Jenin    |
| 376J/017   | MG773509      | E18         | 09/2017                 | 77          | Jenin    |
| 380J/017   | MG773510      | E18         | 08/2017                 | 10.5        | Jenin    |
| 206N/017   | MG773497      | CVB5        | 05/2017                 | 40          | Nablus   |
| 230J/017   | MG773489      | CVB5        | 07/2017                 | 75.5        | Jenin    |
| 211N/017   | MG773511      | CVB2        | 05/2017                 | <1          | Nablus   |
| 260J/017   | MG773490      | CVB5        | 06/2017                 | <1          | Jenin    |
| 338N/017   | MG773491      | CVB5        | 04/2017                 | 4           | Nablus   |
| 342J/017   | MG773492      | CVB5        | 05/2017                 | 1           | Jenin    |
| 345J/017   | MG773495      | CVB5        | 05/2017                 | 21          | Jenin    |
| 354N/017   | MG773496      | CVB5        | 04/2017                 | 35          | Nablus   |
| 407N/017   | MG773494      | CVB5        | 03/2017                 | 1           | Nablus   |
| 433N/017   | MG773493      | CVB5        | 04/2017                 | 49          | Nablus   |
| 261/017    | MG773514      | E25         | 05/2017                 | 42          | Jenin    |
| 299N/017   | MG773512      | E25         | 06/2017                 | 6           | Nablus   |
| 389J/017   | MG773513      | E25         | 09/2017                 | 51          | Jenin    |

156

157 **Phylogenetic analysis of the partial VP1 gene of the E18 and CVB5**

158 Phylogenetic analysis of the partial VP1 gene was conducted using the thirteen E18 and eleven  
159 CVB5 strains from Palestine (9 in 2017 and 2 in 2013). Twenty-seven E18 and 25 CVB5 sequences  
160 were retrieved from GenBank were included for comparison. The phylogenetic tree for E18  
161 showed three main clusters with all Palestinian isolates uniquely clustering together along with  
162 those from China. Similarly, The CVB5 isolates were distributed into three clusters with  
163 Palestinian isolates in 2017 clustering together, along with isolates from different areas of the  
164 world, whereas, the two Palestinian isolates in 2013 grouped within the Predominantly-Chinese  
165 cluster (Figure. 1)



166 **Figure 1. Bootstrap consensus (1000 replicates) neighbor joining (NJ) phylogenetic**  
167 **dendrograms constructed based on the partial VP1 gene of E18 (left) and CVB5 (right).**  
168 **Dendrograms for E18 (○) and CVB5 (□) are plotted against the global distribution of the**  
169 **geographical origin of the isolates. The two cluster contain strains from Palestine (Δ) along**  
170 **with strains from GenBank. Poliovirus from vaccine was included as an out-group.**

## 171 **Recombination analysis**

172 The recombination analysis did not find any statistically significant evidence for recombination  
173 events between the aligned sequences, both on the Palestinian strains level (13 E18 strains and 11  
174 CVB5) and international level that included Palestinian strains pooled with strains from the Gene  
175 bank (40E18 strains and 36CVB5). However, minimum number of recombination events was  
176 detected by DnaSP 5.1 software for E18 and CVB5. RDP4 software (PHI statistic) revealed good  
177 chance of recombination, but at a very low P-value (0.00001).

## 178 **Diversity indices**

179 Population nucleotide diversity indices and neutrality tests were calculated for the partial VP1 gene  
180 for E18 and CVB5, separately, based on phylogenetic clusters (Tables 3 and 4). The totally  
181 haplotype diversity ( $H_d$ ) for the 40 E18 sequences was  $0.98 \pm 0.01$  and  $0.99 \pm 0.006$  for the  
182 36CVB5. At the same time, the total genetic diversity ( $\pi$ ) for E18 was  $0.12 \pm 0.02$  and  $0.17 \pm 0.01$   
183 for CVB5. The average number of nucleotide differences between any two sequences ( $k$ ) for E18  
184 and CVB5 were 35.5 and 41, respectively. Cluster I of E18 showed peculiar results compared to  
185 the other two clusters. In this group, we detected 12 haplotypes in 19 sequences with the lowest  
186 haplotype-to-sequence (h:n) ratio (0.6:1), compared to equal h:n ratio for clusters II and III.  
187 Haplotype diversity ( $H_d$ ), nucleotide diversity ( $\pi$ ), and number of segregating (polymorphic) sites  
188 ( $S$ ) for E18 were lowest in cluster I which is comprised mainly of Palestinian strains (13/19) along

189 with those from China; confirming low level of genetic diversity present in this cluster compared  
 190 to clusters II and III. Tajima's D and Fu-Li's F tests were negative in cluster I and showing  
 191 statistically significant departure from neutrality (random mutation) ( $P < 0.01$ ). As for CVB5  
 192 genotype, cluster III recorded the lowest genetic diversity indices and neutrality tests with negative  
 193 but insignificant values (Table 3 and 4). Both E18 and CVB5 showed a combination of high  
 194 haplotype diversity (Hd), but low genetic diversity ( $\pi$ ). Also, both showed overall negative values  
 195 of neutrality tests; Tajima's D and Fu-Li's F.

196 **Table 3. Haplotype-nucleotide diversity and neutrality tests of three cluster of E18 as calculated for**  
 197 **the VP1 gene**

| Cluster      | Haplotype- nucleotide diversity |           |              |                                  |                                  |             |            | Neutrality tests |              |
|--------------|---------------------------------|-----------|--------------|----------------------------------|----------------------------------|-------------|------------|------------------|--------------|
|              | n                               | h         | h:n          | Hd $\pm$ SD                      | $\pi \pm$ SD                     | K           | S          | Tajima's D       | Fu-Li's F    |
| RED-I        | 19                              | 12        | 0.6:1        | 0.92 $\pm$ 0.05                  | 0.03 $\pm$ 0.01                  | 11.3        | 67         | -1.80*           | -2.97*       |
| Green-II     | 7                               | 7         | 1:1          | 1.0 $\pm$ 0.08                   | 0.07 $\pm$ 0.01                  | 61.9        | 165        | -0.57            | -0.56        |
| Blue-III     | 10                              | 9         | 0.9:1        | 1.0 $\pm$ 0.05                   | 0.06 $\pm$ 0.01                  | 55.2        | 171        | -0.93            | -1.12        |
| <b>Total</b> | <b>41</b>                       | <b>34</b> | <b>0.9:1</b> | <b>0.98<math>\pm</math> 0.01</b> | <b>0.12<math>\pm</math> 0.02</b> | <b>35.5</b> | <b>184</b> | <b>-1.50</b>     | <b>-2.80</b> |

198 n: Number of sequences, h: Number of Haplotypes, Hd: Haplotype (gene) diversity,  $\pi$ : Nucleotide diversity (per  
 199 site), K: Average number of nucleotide differences between two randomly chosen sequences from within in the  
 200 population, S: Number of variable/segregating sites. (1 outgroup, 4 have no clear cluster). \*:  $P < 0.01$ .

201 **Table 4. Haplotype/nucleotide diversity and neutrality tests of three cluster of CVB5 as calculated for the**  
 202 **VP1 gene**

| Cluster      | Haplotype nucleotide diversity |           |            |                                   |                                  |              |            | Neutrality tests |              |
|--------------|--------------------------------|-----------|------------|-----------------------------------|----------------------------------|--------------|------------|------------------|--------------|
|              | n                              | h         | n:h        | Hd $\pm$ SD                       | $\pi \pm$ SD                     | K            | S          | Tajima's D       | Fu-Li's F    |
| Blue-I       | 14                             | 14        | 1:1        | 1.0 $\pm$ 0.03                    | 0.13 $\pm$ 0.009                 | 89.3         | 89         | 0.05             | 0.36         |
| Green-II     | 13                             | 13        | 1:1        | 1.0 $\pm$ 0.03                    | 0.10 $\pm$ 0.01                  | 28.3         | 74         | -0.257           | -0.27        |
| RED-III      | 19                             | 18        | 1:1        | 0.94 $\pm$ 0.02                   | 0.08 $\pm$ 0.007                 | 24.3         | 75         | -0.55            | -1.13        |
| <b>Total</b> | <b>46</b>                      | <b>45</b> | <b>1:1</b> | <b>0.99<math>\pm</math> 0.006</b> | <b>0.17<math>\pm</math> 0.01</b> | <b>41.04</b> | <b>133</b> | <b>-0.75</b>     | <b>-1.76</b> |

203 n: Number of sequences, h: Number of Haplotypes, Hd: Haplotype (gene) diversity,  $\pi$ : Nucleotide diversity (per  
 204 site), K: Average number of nucleotide differences between two randomly chosen sequences from within in the  
 205 population, S: Number of variable/segregating sites. (1 outgroup, 4 have no clear cluster)

206

207 Inter-population pairwise genetic distance (Fst) in the three E18 populations ranged from 0.39 to  
 208 0.63 with Nm value from 0.29 to 0.78 (Table 5 and 6). Fst for cluster I containing all Palestinian  
 209 strains compared to clusters II and III were high (0.51 and 0.63) (positive Tajima's D) indicating  
 210 population differentiation with low gene flow, Nm (0.48 and 0.29). However, genetic

211 differentiation between clusters II and III is low ( $F_{st}=0.39$ ) with high  $N_m$  (0.78), but still reflected  
212 genetic differentiation. This is supported by the negative value of  $G_{st}$  (-0.006).  
213 As for CVB5, cluster III which contained most of the Palestinian strains is differentiated from the  
214 other two clusters, I and II, as reflected by the high  $F_{st}$  and low  $N_m$  values ( $F_{st}=0.54$ ,  $N_m=0.43$ )  
215 and ( $F_{st}=0.49$  and 0.52), respectively. At the same time, the genetic differentiation between  
216 clusters I and II is relatively low as supported by very low  $G_{st}$  value ( $G_{st}=0.00005$ ) and relatively  
217 low  $F_{st}$  (0.32) with high gene flow ( $N_m=1.06$ ).

218 **Table 5: Gene flow and genetic differentiation indices between the three E18 clusters**  
219 **estimated from VP1 sequences**

220

| Phylogroup 1 | Phylogroup 2 | $F_{st}$ | $N_m$ | $K_{xy}$ | $D_{xy}$ | $G_{st}$ | $D_a$ |
|--------------|--------------|----------|-------|----------|----------|----------|-------|
| Red-I        | Green-II     | 0.51     | 0.48  | 30.6     | 0.09     | 0.029    | 0.05  |
| Red-I        | Blue-III     | 0.63     | 0.29  | 39.7     | 0.13     | 0.024    | 0.08  |
| Blue -III    | Green-II     | 0.39     | 0.78  | 30.2     | 0.09     | -0.006   | 0.04  |

221  $F_{st}$ : Wright's F-statistics, pairwise genetic distance,  $N_m$ : Gene flow and population migration among populations  
222 which is calculated as  $N_m=(1-F_{st})/2F_{st}$ ,  $K_{xy}$ : Average proportion of nucleotide differences between populations.  $D_{xy}$ :  
223 The average number of nucleotide substitutions per site between populations,  $D_a$ : The number of net nucleotide  
224 substitutions per site between populations,  $G_{st}$ : Genetic differentiation index based on the frequency of haplotypes.

225

226 **Table 6: Gene flow and genetic differentiation indices between the three CB5 clusters**  
227 **estimated from VP1 sequences**

228

| Phylogroup 1 | Phylogroup 2 | $F_{st}$ | $N_m$ | $K_{xy}$ | $D_{xy}$ | $G_{st}$ | $D_a$ |
|--------------|--------------|----------|-------|----------|----------|----------|-------|
| Red-III      | Green-II     | 0.54     | 0.43  | 48.8     | 0.19     | 0.005    | 0.11  |
| Red-III      | Blue-I       | 0.49     | 0.52  | 51.8     | 0.21     | 0.005    | 0.10  |
| Blue-I       | Green-II     | 0.32     | 1.06  | 43.9     | 0.18     | 0.00005  | 0.06  |

229  $F_{st}$ : Wright's F-statistics, pairwise genetic distance,  $N_m$ : Gene flow and population migration among populations  
230 which is calculated as  $N_m=(1-F_{st})/2F_{st}$ ,  $K_{xy}$ : Average proportion of nucleotide differences between populations  $D_{xy}$ :  
231 The average number of nucleotide substitutions per site between populations,  $D_a$ : The number of net nucleotide  
232 substitutions per site between populations,  $G_{st}$ : Genetic differentiation index based on the frequency of haplotypes.

233

234

235

236

237

238

## 239 **Discussion**

240 So far, only one report in Palestine confirmed the isolation of 7 different enteroviruses genotypes  
241 including echovirus 13, 14, 9, 30, 16, 6 and coxsackievirus B5 from sporadic cases of aseptic  
242 meningitis and/or sepsis like illness[10]. In the present study, all of the HEV positive cases  
243 occurred in children less than 7 years old and 50% of them < 1-year-old. Highest rate of  
244 enterovirus-positive cases was reported previously in children less than 1 year of age in Palestine,  
245 United States, and Korea [10, 38]. On the contrary, other studies, reported that HEV aseptic  
246 meningitis occurs most frequently in patients with age range of 3–12 years' old [13-15, 39]. The  
247 discrepancy in the HEV age groups could be due to the source of cases whether sporadic or from  
248 an outbreak.

249 The present study showed that E18 and CVB5 were the most predominant genotypes, representing,  
250 50% and 34.6% respectively. Several recent studies in Germany, Taiwan, Korea, and China  
251 reported that both E18 and CVB5 were the most predominant HEVs reported from sporadic and  
252 outbreak cases of aseptic meningitis [13, 15-16, 40].

253 All E18 sequences included in the phylogenetic analysis grouped into three major genetic clusters.  
254 The E18 isolates from Palestine clustered together along with those from China reported in 2015  
255 in cluster I. Clusters II and III contain E18 from Australia, France, USA, Sweden, Russian,  
256 Germany and Netherlands reported in the periods 2005- 2012 and 1999-2012, respectively. Other  
257 minor clusters included cluster IV and V which included the prototype Metacalf and few HEV  
258 reported from India and China in the period 2000-2008. HEV types in clusters IV and V may have  
259 circulated during a limited period and then disappeared. Similar results reported a genetic  
260 divergence in the complete VP1 gene of the E18 that resulted in the formation of five phylogenetic  
261 clusters [40]. These viruses were reported recently from China, India, South Korea, Australia,

262 Netherlands, Germany, Sweden, Russia and France [40]. Phylogenetic analysis of partial or  
263 complete VP1 gene of E11, E30, E13, and E6 of the HEV-B species revealed high genetic diversity  
264 showing several clusters and sub-clusters [40]. Accordingly, such data indicate that the same HEV  
265 genotype may circulate in different geographies at different times. Therefore, and due to lack of  
266 reporting HEVs in Palestine, the possibility of knowing whether E18 isolates in cluster I are  
267 recently introduced or have already been circulating before remains a dilemma.

268 The CVB5 sequences grouped into three genetic clusters (Fig 1). Cluster III contained the 9  
269 Palestinian strains isolated in 2017 along with CVB5 from Brazil, France, Cyprus, Germany and  
270 Australia reported in the period from 2006 to 2017. The 2 Palestinian isolates in 2013 grouped  
271 with a more recent CVB5 in cluster II (2003-2014) from China, Denmark, France and Netherland.  
272 Cluster I contained the prototype Faulkner and isolates from France, Germany, Japan, Korea,  
273 China, Hong Kong, India, Finland and Sweden. Recently, few studies compared the partial or the  
274 complete VP1 gene revealing genetic diversity of CVB5 in 2-5 clusters [41-43]. Accordingly, the  
275 findings in the present study reaffirm that two or more clusters may co-circulate and coevolve in  
276 the same region as a result of the genetic diversity forces such as mutation or recombination.

277 The recombination for both species E18 and CVB5 was minimal, if at all present between the  
278 study sequences which could be explained by the infrequency of recombination within the capsid  
279 region, VP1 [19-20]. This puts forward mutation rates as the main cause of genetic diversity. The  
280 significant departure from neutrality as confirmed by negative Tajima's D and Fu-Li's F  
281 accompanied by high haplotype (Hd) and low nucleotide diversity ( $\pi$ ) for cluster I of E18 (Table3)  
282 may suggest recent rapid population expansion phase following bottleneck or genetic hitchhiking  
283 (genetic draft or gene sweep) that bring excess number of rare alleles. This was supported by the  
284 negative values Tajima's D and Fu-Li's F tests in the individual populations and the overall value

285 for the three populations. A study in Taiwan showed that partial VP1 genes of E18 have low  
286 genetic diversity with high similarity between regions [14]. The clustering of the Palestinian and  
287 Chinese isolates in cluster I could have been brought about by the activity of Palestinian traders to  
288 China and back. Cluster II and III had similar diversity indices, but without any significance.  
289 Cluster III of CVB5 showed lower genetic diversity than the others (Table 4), yet insignificant;  
290 suggesting that cluster III may have undergone a neutral or contraction period or may be due to  
291 small subpopulations with limited number of sequences to yield sufficient statistical power. A  
292 study from Korea revealed very high similarity in the partial VP1 sequences among Korean  
293 samples (intra-population similarity) and between Chinese strains (inter-population similarity)  
294 [16]. The genetic similarity of the Palestinian, Korean and Taiwanese E18 and CVB5 strains to  
295 those from China, may hint to their dispersal from China to the rest of the world [14, 16]. However,  
296 a more extensive study of several endemic areas should be conducted to confirm the ancestral  
297 origin of E18 and CVB5, the route of spread and the distribution.

298 The estimations of inter-population comparison indices ( $F_{st}$ ,  $N_m$ ,  $K_{xy}$ ,  $D_{xy}$ ,  $G_{st}$  and  $D_a$ ) (Tables 5  
299 and 6) support high level of genetic differentiation between the three main clusters of both E18  
300 and CVB5. These results are supportive of the cluster in phylogenetic analyses (Fig1).

301 In conclusion, the present study unravels three main clusters for each of the E18 and CVB5 with  
302 both showing high haplotype diversity compared to lower genetic diversity. The Palestinian  
303 isolates grouped mainly into one cluster for each viral species. Finally, present study supports close  
304 genetic relationship between Palestinian HEV species as confirmed by population genetics and  
305 phylogenetic analyses.

306

307

300  
418 REFERENCE

- 419 [1] Knowles NJ, Hovi T, Hyypiä T, King AMQ, Lindberg AM, Pallansch MA. Virus taxonomy:  
420 classification and nomenclature of viruses: ninth report of the international committee on  
421 taxonomy of viruses. In: King AMQ AM, Carstens EB, Lefkowitz EJ,, editor. Picornaviridae. San  
422 Diego: Elsevier; 2012. p. 885-80.
- 423 [2] Oberste MS, Maher K, Kilpatrick DR, Flemister MR, Brown BA, Pallansch MA. Typing of  
424 human enteroviruses by partial sequencing of VP1. *J Clin Microbiol.* 1999;37:1288-93.
- 425 [3] Harvala H, Calvert J, Van Nguyen D, Clasper L, Gadsby N, Molyneaux P, et al. Comparison of  
426 diagnostic clinical samples and environmental sampling for enterovirus and parechovirus  
427 surveillance in Scotland, 2010 to 2012. *Euro Surveill.* 2014;19.
- 428 [4] Othman I, Volle R, Elargoubi A, Guediche MN, Chakroun M, Sfar MT, et al. Enterovirus  
429 meningitis in Tunisia (Monastir, Mahdia, 2011-2013): identification of virus variants  
430 cocirculating in France. *Diagn Microbiol Infect Dis.* 2016;84:116-22.
- 431 [5] Xiao H, Guan D, Chen R, Chen P, Monagin C, Li W, et al. Molecular characterization of  
432 echovirus 30-associated outbreak of aseptic meningitis in Guangdong in 2012. *Viol J.*  
433 2013;10:263.
- 434 [6] Logotheti M, Pogka V, Horefti E, Papadacos K, Giannaki M, Pangalis A, et al. Laboratory  
435 investigation and phylogenetic analysis of enteroviruses involved in an aseptic meningitis  
436 outbreak in Greece during the summer of 2007. *J Clin Virol.* 2009;46:270-4.
- 437 [7] Glaser CA, Honarmand S, Anderson LJ, Schnurr DP, Forghani B, Cossen CK, et al. Beyond  
438 viruses: clinical profiles and etiologies associated with encephalitis. *Clin Infect Dis.*  
439 2006;43:1565-77.
- 440 [8] Laxmivandana R, Yergolkar P, Gopalkrishna V, Chitambar SD. Characterization of the non-  
441 polio enterovirus infections associated with acute flaccid paralysis in South-Western India. *PLoS*  
442 *One.* 2013;8:e61650.
- 443 [9] Lang M, Mirand A, Savy N, Henquell C, Maridet S, Perignon R, et al. Acute flaccid paralysis  
444 following enterovirus D68 associated pneumonia, France, 2014. *Euro Surveill.* 2014;19.
- 445 [10] Dumaidi K, Al-Jawabreh A. Molecular detection and genotyping of enteroviruses from CSF  
446 samples of patients with suspected sepsis-like illness and/or aseptic meningitis from 2012 to  
447 2015 in West Bank, Palestine. *PLoS One.* 2017;12:e0172357.
- 448 [11] Chen X, Li J, Guo J, Xu W, Sun S, Xie Z. An outbreak of echovirus 18 encephalitis/meningitis  
449 in children in Hebei Province, China, 2015. *Emerg Microbes Infect.* 2017;6:e54.
- 450 [12] Zhu Y, Zhou X, Liu J, Xia L, Pan Y, Chen J, et al. Molecular identification of human  
451 enteroviruses associated with aseptic meningitis in Yunnan province, Southwest China.  
452 *Springerplus.* 2016;5:1515.
- 453 [13] Liu N, Jia L, Yin J, Wu Z, Wang Z, Li P, et al. An outbreak of aseptic meningitis caused by a  
454 distinct lineage of coxsackievirus B5 in China. *Int J Infect Dis.* 2014;23:101-4.
- 455 [14] Tsai HP, Huang SW, Wu FL, Kuo PH, Wang SM, Liu CC, et al. An echovirus 18-associated  
456 outbreak of aseptic meningitis in Taiwan: epidemiology and diagnostic and genetic aspects. *J*  
457 *Med Microbiol.* 2011;60:1360-5.
- 458 [15] Krumbholz A, Egerer R, Braun H, Schmidtke M, Rimek D, Kroh C, et al. Analysis of an  
459 echovirus 18 outbreak in Thuringia, Germany: insights into the molecular epidemiology and  
460 evolution of several enterovirus species B members. *Med Microbiol Immunol.* 2016;205:471-83.



- 461 [16] Baek K, Park K, Jung E, Chung E, Park J, Choi H, et al. Molecular and epidemiological  
462 characterization of enteroviruses isolated in Chungnam, Korea from 2005 to 2006. *J Microbiol*  
463 *Biotechnol.* 2009;19:1055-64.
- 464 [17] Huang B, Harrower B, Burtonclay P, Constantino T, Warrilow D. Genome Sequences of  
465 Coxsackievirus B5 Isolates from Two Children with Meningitis in Australia. *Genome Announc.*  
466 2017;5.
- 467 [18] Muslin C, Joffret ML, Pelletier I, Blondel B, Delpeyroux F. Evolution and Emergence of  
468 Enteroviruses through Intra- and Inter-species Recombination: Plasticity and Phenotypic Impact  
469 of Modular Genetic Exchanges in the 5' Untranslated Region. *PLoS Pathog.* 2015;11:e1005266.
- 470 [19] Lukashev AN. Role of recombination in evolution of enteroviruses. *Rev Med Virol.*  
471 2005;15:157-67.
- 472 [20] Simmonds P, Welch J. Frequency and dynamics of recombination within different species  
473 of human enteroviruses. *J Virol.* 2006;80:483-93.
- 474 [21] Guney C, Ozkaya E, Yapar M, Gumus I, Kubar A, Doganci L. Laboratory diagnosis of  
475 enteroviral infections of the central nervous system by using a nested RT-polymerase chain  
476 reaction (PCR) assay. *Diagn Microbiol Infect Dis.* 2003;47:557-62.
- 477 [22] Thoelen I, Lemey P, Van Der Donck I, Beuselinck K, Lindberg AM, Van Ranst M. Molecular  
478 typing and epidemiology of enteroviruses identified from an outbreak of aseptic meningitis in  
479 Belgium during the summer of 2000. *J Med Virol.* 2003;70:420-9.
- 480 [23] Martin D, Rybicki E. RDP: detection of recombination amongst aligned sequences.  
481 *Bioinformatics.* 2000;16:562-3.
- 482 [24] Bruen TC, Philippe H, Bryant D. A simple and robust statistical test for detecting the  
483 presence of recombination. *Genetics.* 2006;172:2665-81.
- 484 [25] Sawyer, SA. Geneconv: a computer package for the statistical detection of gene  
485 conversion. Department of Mathematics. Washington University in St Louis.  
486 <http://www.math.wustl.edu/sawyer/>; 1999.
- 487 [26] Salminen MO, Carr JK, Burke DS, McCutchan FE. Identification of breakpoints in  
488 intergenotypic recombinants of HIV type 1 by bootscanning. *AIDS Res Hum Retroviruses.*  
489 1995;11:1423-5.
- 490 [27] Smith JM. Analyzing the mosaic structure of genes. *J Mol Evol.* 1992;34:126-9.
- 491 [28] Posada D, Crandall KA. Evaluation of methods for detecting recombination from DNA  
492 sequences: computer simulations. *Proc Natl Acad Sci U S A.* 2001;98:13757-62.
- 493 [29] Martin DP, Williamson C, Posada D. RDP2: recombination detection and analysis from  
494 sequence alignments. *Bioinformatics.* 2005;21:260-2.
- 495 [30] Huson DH, Bryant D. Application of phylogenetic networks in evolutionary studies. *Mol Biol*  
496 *Evol.* 2006;23:254-67.
- 497 [31] Hudson RR, Kaplan NL. Statistical properties of the number of recombination events in the  
498 history of a sample of DNA sequences. *Genetics.* 1985;111:147-64.
- 499 [32] Thai KT, Henn MR, Zody MC, Tricou V, Nguyet NM, Charlebois P, et al. High-resolution  
500 analysis of intrahost genetic diversity in dengue virus serotype 1 infection identifies mixed  
501 infections. *J Virol.* 2012;86:835-43.
- 502 [33] Tamura K, Stecher G, Peterson D, Filipski A, Kumar S. MEGA6: Molecular Evolutionary  
503 Genetics Analysis version 6.0. *Mol Biol Evol.* 2013;30:2725-9.



- 504 [34] Nei M. Molecular evolutionary genetics. New York: Colombia University Press. 512 p.M.  
505 1987.
- 506 [35] Tajima F. Statistical method for testing the neutral mutation hypothesis by DNA  
507 polymorphism. *Genetics*. 1989;123:585-95.
- 508 [36] Fu YX, Li WH. Statistical tests of neutrality of mutations. *Genetics*. 1993;133:693-709.
- 509 [37] Rozas J, Ferrer-Mata A, Sanchez-DelBarrio JC, Guirao-Rico S, Librado P, Ramos-Onsins SE, et  
510 al. DnaSP 6: DNA Sequence Polymorphism Analysis of Large Data Sets. *Mol Biol Evol*.  
511 2017;34:3299-302.
- 512 [38] Sawyer MH, Holland D, Aintablian N, Connor JD, Keyser EF, Waecker NJ, Jr. Diagnosis of  
513 enteroviral central nervous system infection by polymerase chain reaction during a large  
514 community outbreak. *Pediatr Infect Dis J*. 1994;13:177-82.
- 515 [39] Muehlenbachs A, Bhatnagar J, Zaki SR. Tissue tropism, pathology and pathogenesis of  
516 enterovirus infection. *J Pathol*. 2015;235:217-28.
- 517 [40] Zhang H, Zhao Y, Liu H, Sun H, Huang X, Yang Z, et al. Molecular characterization of two  
518 novel echovirus 18 recombinants associated with hand-foot-mouth disease. *Sci Rep*.  
519 2017;7:8448.
- 520 [41] Gullberg M, Tolf C, Jonsson N, Mulders MN, Savolainen-Kopra C, Hovi T, et al.  
521 Characterization of a putative ancestor of coxsackievirus B5. *J Virol*. 2010;84:9695-708.
- 522 [42] Papa A, Skoura L, Dumaidi K, Spiliopoulou A, Antoniadis A, Frantzidou F. Molecular  
523 epidemiology of Echovirus 6 in Greece. *Eur J Clin Microbiol Infect Dis*. 2009;28:683-7.
- 524 [43] Rezig D, Fares W, Seghier M, Yahia AB, Touzi H, Triki H. Update on molecular  
525 characterization of coxsackievirus B5 strains. *J Med Virol*. 2011;83:1247-54.  
526  
527

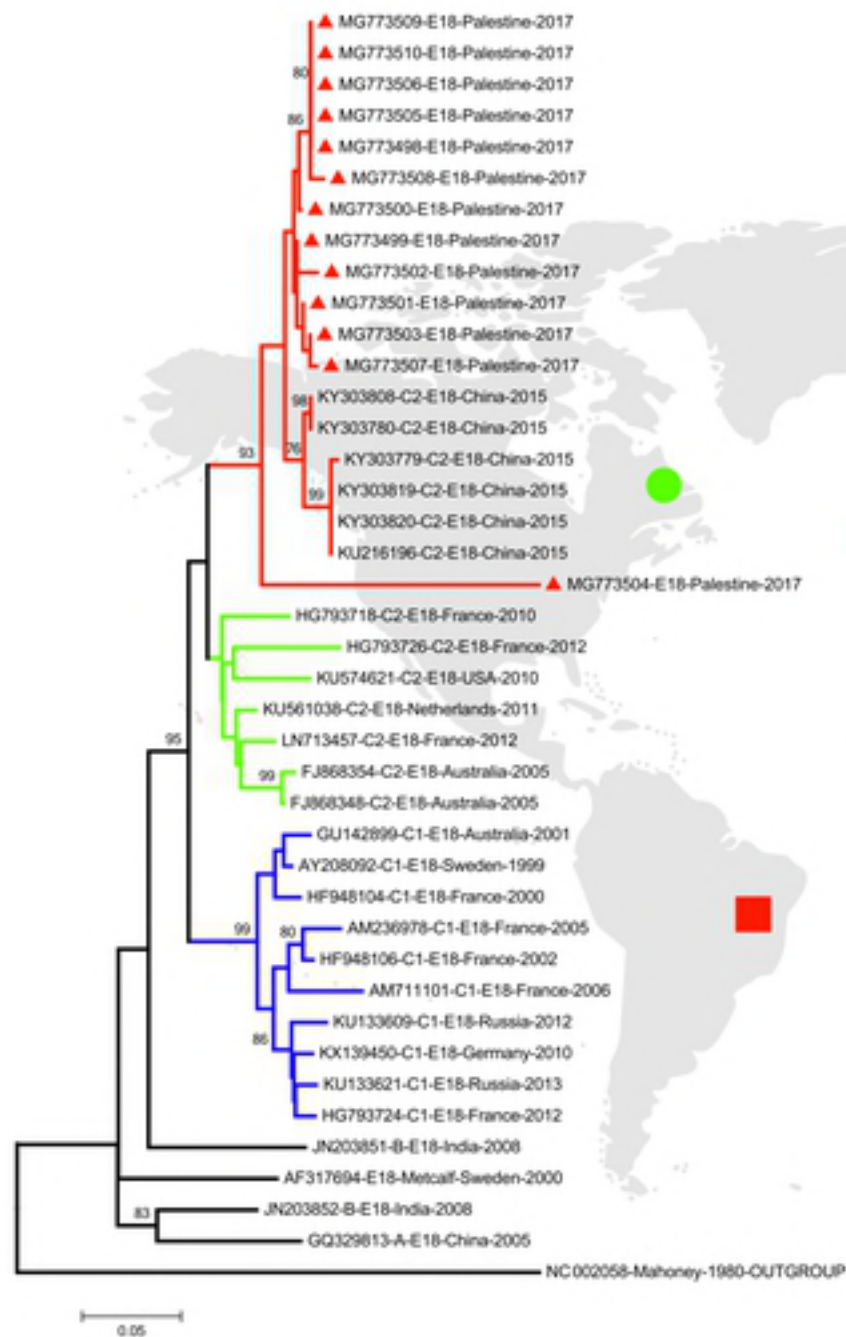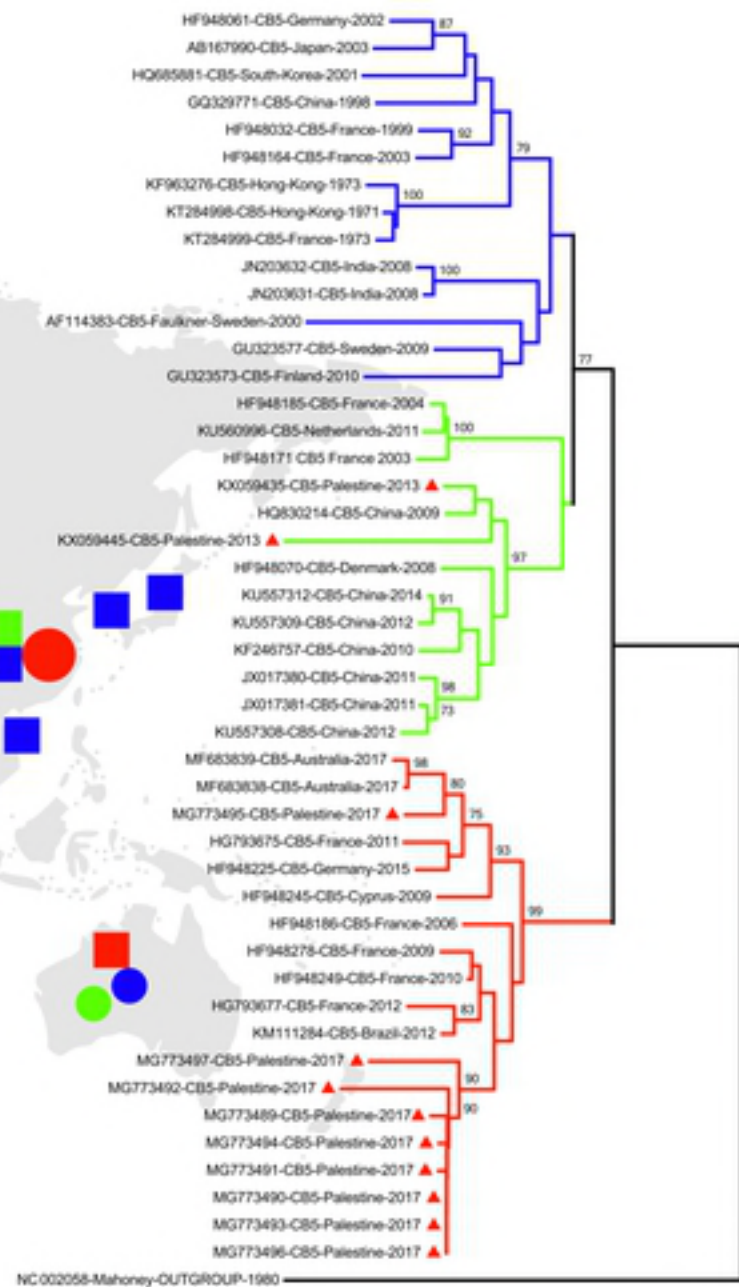

○ **E18**

▲ **Palestine**

□ **CB5**
